# Effects of age and sex on patient-reported outcomes following total knee arthroplasty with a rotating bearing tibial platform design: A single-surgeon practice registry study

Manaal Fatima [1]  
Corey Scholes [1]  
John Ireland [2]

[1] EBM Analytics, Sydney

[2] Sydney Bone and Joint Clinic, Chipping Norton

## Corresponding author

John Ireland  
jeireland@me.com  
Sydney Bone and Joint Clinic  
Chipping Norton

## Withdrawal statement

The authors have withdrawn their manuscript owing to a manufacturer's recall notice for the implant reported. The results reported here may have been impacted by a higher than expected rate of implant revision, which cannot be verified in the available data. Therefore, the authors do not wish this work to be cited as reference for the project. If you have any questions, please contact the corresponding author.
